# Supplementary material for: Investigating the Reasons for Receiving the Second Booster Dose of the COVID-19 Vaccine in Adults and in People with Chronic Medical Conditions in Southern Italy
Source: MDPI journal article supplement (doi:10.3390/vaccines11040737), 2023-03-27
Supplement: s1 [file s1]

**Supplementary Material. Questionnaire.**

**A. SOCIO-DEMOGRAPHIC AND ANAMNESTIC CHARACTERISTICS**

**This section is designed to gather information about your socio-demographic and anamnestic characteristics**

**A1.** How old were you on your last birthday? \_\_\_\_\_

**A2.** What is your gender? ☐ Male ☐ Female

**A3.** What is your marital status? ☐ Married ☐ Cohabiting ☐ Other (*please specify*) \_\_\_\_\_

**A4.** What is your highest educational level? ☐ None ☐ Primary school ☐ High school ☐ Baccalaureate  
☐ Graduate ☐ Other (*please specify*) \_\_\_\_\_

**A5.** What is your occupation? \_\_\_\_\_

**A6.** Do you have any chronic medical condition? ☐ No ☐ Yes (*please specify*) \_\_\_\_\_

**A7.** Have you ever had a test that showed you had been infected by SARS-CoV-2? ☐ No (*go to A8*)

☐ Yes, how many times \_\_\_\_\_

☐ Before the vaccination: \_\_\_\_ times ☐ After the first dose of vaccine: \_\_\_\_ times

☐ After the second dose of vaccine: \_\_\_\_ times ☐ After the third dose of vaccine: \_\_\_\_ times

**A8.** Has any family member/colleague/friend been infected by SARS-CoV-2? ☐ No ☐ Yes

**A9.** Have you been vaccinated against influenza last year? ☐ No ☐ Yes

**B. ATTITUDES**

**This section is designed to explore your attitudes towards SARS-CoV-2 infection and its vaccine**

**B1.** On a scale from 1 to 10, how serious do you consider the SARS-CoV-2 infection? (*1 indicates that you do not consider it serious at all, 10 if you consider it a very serious disease*)

**Not serious**      1      2      3      4      5      6      7      8      9      10      **Very serious**

**B2.** On a scale from 1 to 10, how much do you perceive yourself at risk of getting the SARS-CoV-2 infection? (*1 indicates that you do not consider yourself at risk at all, 10 if you consider yourself very much at risk*)

**Not at risk**      1      2      3      4      5      6      7      8      9      10      **Very much at risk**

**B3.** On a scale from 1 to 10, how useful do you consider the second booster dose of the COVID-19 vaccine? (*1 indicates that you do not consider it useful at all, 10 if you consider it very useful*)

**Not useful**      1      2      3      4      5      6      7      8      9      10      **Very useful**

**B4.** On a scale from 1 to 10, how protective for you do you consider the second booster dose of the COVID-19 vaccine? (*1 indicates that you do not consider it protective at all, 10 if you consider it very much protective*)

**Not protective**      1      2      3      4      5      6      7      8      9      10      **Very much protective**

**B5.** On a scale from 1 to 10, how much trust do you have in the information you receive on the second booster dose of the COVID-19 vaccine? (*1 indicates that you have no trust, 10 if you have full trust*)

**No trust**      1      2      3      4      5      6      7      8      9      10      **Full trust**

**B6.** Why did you decide to receive the second booster dose of the COVID-19 vaccine? (*more than one answer is allowed*)

☐ To protect myself from getting COVID-19

☐ Fear of acquiring COVID-19

☐ To protect my family members from getting COVID-19

☐ To protect others from getting COVID-19

☐ COVID-19 is a severe disease

☐ COVID-19 is a very contagious disease

☐ The second booster dose is safe

☐ Recommended by a physician

☐ The second booster dose is effective

☐ Feel to be at risk of getting a severe form of SARS-CoV-2 infection

**C. INFORMATION**

**The section is designed to explore your sources of information about the second booster dose of the COVID-19 vaccine**

**C1.** Which sources did you use to receive information about the second booster dose of the COVID-19 vaccine? (*more than one source is allowed*) ☐ None

☐ Physicians ☐ Internet ☐ Institutional organizations ☐ Social media (Facebook, Twitter, Instagram, YouTube, etc.)

☐ Mass media ☐ Friends and Family ☐ Scientific journals ☐ Other (*please specify*) \_\_\_\_\_

**C2.** Do you feel you need additional information on the second booster dose of the COVID-19 vaccine? ☐ No ☐ Yes
